# Supplementary material for: Expert Opinions on the Most Promising Treatments and Vaccine Candidates for COVID-19: Global Cross-sectional Survey of Virus Researchers in the Early Months of the Pandemic
Source: PubMed Central journal article supplement (PMC7919842; doi:10.2196/22483), 2021-02-26
Supplement: publichealth_v7i2e22483_app2.pdf [file publichealth_v7i2e22483_app2.pdf]

Please indicate your knowledge level on prevention and treatment of coronavirus-related human diseases

| <b>main_question</b>  | <b>n</b> | <b>%</b> |
|-----------------------|----------|----------|
| I have good knowledge | 735      | 57.6%    |
| I have some knowledge | 495      | 38.8%    |
| I have no knowledge   | 45       | 3.5%     |
| Total                 | 1275     |          |

Is it likely that a vaccine for COVID-19 will be available in the next 18 months?

| <b>knowledge</b> | <b>total_knowledge</b> | <b>answer_vac1</b> | <b>n</b> | <b>%</b> |
|------------------|------------------------|--------------------|----------|----------|
| Good knowledge   | 729                    | Likely             | 457      | 37.5%    |
| Good knowledge   | 729                    | Unlikely           | 167      | 13.7%    |
| Good knowledge   | 729                    | Unknown            | 105      | 8.6%     |
| Some knowledge   | 490                    | Likely             | 309      | 25.3%    |
| Some knowledge   | 490                    | Unlikely           | 122      | 10.0%    |
| Some knowledge   | 490                    | Unknown            | 59       | 4.8%     |
| Total            | 1219                   |                    |          |          |

In the next 18 months, of all vaccine candidates currently in phase 1 or 2 clinical trials, which of these do you consider most likely to succeed in preventing COVID-19? + Which of all vaccine candidates currently in phase 1 or 2 clinical trials do you consider most likely to succeed in preventing COVID-19?

| knowledge      | Total | answer_vac1 | answer_vac2                                                        | n   | %     |
|----------------|-------|-------------|--------------------------------------------------------------------|-----|-------|
| Good knowledge | 435   | Likely      | Pathogen-specific aAPC from Shenzhen Geno-Immune Medical Institute | 16  | 1.6%  |
| Good knowledge | 435   | Likely      | Ad5-nCoV from CanSino Biologicals                                  | 26  | 2.6%  |
| Good knowledge | 435   | Likely      | INO-4800 from Inovio Pharmaceuticals                               | 8   | 0.8%  |
| Good knowledge | 435   | Likely      | LV-SMENP-DC from Shenzhen Geno-Immune Medical Institute            | 5   | 0.5%  |
| Good knowledge | 435   | Likely      | mRNA-1273 from Moderna                                             | 39  | 3.9%  |
| Good knowledge | 435   | Likely      | ChAdOx1 from University of Oxford                                  | 100 | 9.9%  |
| Good knowledge | 435   | Likely      | Other                                                              | 31  | 3.1%  |
| Good knowledge | 435   | Likely      | Unknown                                                            | 105 | 10.4% |
| Good knowledge | 435   | Likely      | I prefer not to answer                                             | 105 | 10.4% |
| Good knowledge | 160   | Unlikely    | Pathogen-specific aAPC from Shenzhen Geno-Immune Medical Institute | 1   | 0.1%  |
| Good knowledge | 160   | Unlikely    | Ad5-nCoV from CanSino Biologicals                                  | 3   | 0.3%  |
| Good knowledge | 160   | Unlikely    | INO-4800 from Inovio Pharmaceuticals                               | 1   | 0.1%  |
| Good knowledge | 160   | Unlikely    | LV-SMENP-DC from Shenzhen Geno-Immune Medical Institute            | 2   | 0.2%  |
| Good knowledge | 160   | Unlikely    | mRNA-1273 from Moderna                                             | 14  | 1.4%  |
| Good knowledge | 160   | Unlikely    | ChAdOx1 from University of Oxford                                  | 35  | 3.5%  |
| Good knowledge | 160   | Unlikely    | Other                                                              | 6   | 0.6%  |
| Good knowledge | 160   | Unlikely    | Unknown                                                            | 55  | 5.5%  |
| Good knowledge | 160   | Unlikely    | I prefer not to answer                                             | 43  | 4.3%  |
| Some knowledge | 296   | Likely      | Pathogen-specific aAPC from Shenzhen Geno-Immune Medical Institute | 10  | 1.0%  |
| Some knowledge | 296   | Likely      | Ad5-nCoV from CanSino Biologicals                                  | 7   | 0.7%  |
| Some knowledge | 296   | Likely      | INO-4800 from Inovio Pharmaceuticals                               | 4   | 0.4%  |
| Some knowledge | 296   | Likely      | LV-SMENP-DC from Shenzhen Geno-Immune Medical Institute            | 6   | 0.6%  |
| Some knowledge | 296   | Likely      | mRNA-1273 from Moderna                                             | 16  | 1.6%  |
| Some knowledge | 296   | Likely      | ChAdOx1 from University of Oxford                                  | 45  | 4.5%  |
| Some knowledge | 296   | Likely      | Other                                                              | 19  | 1.9%  |
| Some knowledge | 296   | Likely      | Unknown                                                            | 114 | 11.3% |
| Some knowledge | 296   | Likely      | I prefer not to answer                                             | 75  | 7.4%  |
| Some knowledge | 117   | Unlikely    | Pathogen-specific aAPC from Shenzhen Geno-Immune Medical Institute | 0   | 0.0%  |
| Some knowledge | 117   | Unlikely    | Ad5-nCoV from CanSino Biologicals                                  | 3   | 0.3%  |
| Some knowledge | 117   | Unlikely    | INO-4800 from Inovio Pharmaceuticals                               | 0   | 0.0%  |
| Some knowledge | 117   | Unlikely    | LV-SMENP-DC from Shenzhen Geno-Immune Medical Institute            | 0   | 0.0%  |
| Some knowledge | 117   | Unlikely    | mRNA-1273 from Moderna                                             | 5   | 0.5%  |
| Some knowledge | 117   | Unlikely    | ChAdOx1 from University of Oxford                                  | 12  | 1.2%  |
| Some knowledge | 117   | Unlikely    | Other                                                              | 7   | 0.7%  |
| Some knowledge | 117   | Unlikely    | Unknown                                                            | 57  | 5.7%  |
| Some knowledge | 117   | Unlikely    | I prefer not to answer                                             | 33  | 3.3%  |
| Total          | 1008  |             |                                                                    |     |       |

In the next six months, which one of these broad approaches do you consider most likely to succeed as COVID-19 treatment?

| <b>knowledge</b> | <b>total_knowledge</b> | <b>answer_drug1</b>                             | <b>n</b> | <b>%</b> |
|------------------|------------------------|-------------------------------------------------|----------|----------|
| Good knowledge   | 694                    | Antivirals and antiretrovirals                  | 311      | 26.8%    |
| Good knowledge   | 694                    | Antimalarials                                   | 17       | 1.5%     |
| Good knowledge   | 694                    | Antibiotics                                     | 5        | 0.4%     |
| Good knowledge   | 694                    | Angiotensin-converting-enzyme (ACE) inhibitors  | 23       | 2.0%     |
| Good knowledge   | 694                    | Anti-inflammatories                             | 40       | 3.5%     |
| Good knowledge   | 694                    | Non-drug technologies (e.g. plasma, stem-cells) | 83       | 7.2%     |
| Good knowledge   | 694                    | Monoclonal antibodies                           | 114      | 9.8%     |
| Good knowledge   | 694                    | Kinase inhibitors                               | 2        | 0.2%     |
| Good knowledge   | 694                    | Other                                           | 24       | 2.1%     |
| Good knowledge   | 694                    | Unknown                                         | 47       | 4.1%     |
| Good knowledge   | 694                    | I prefer not to answer                          | 28       | 2.4%     |
| Some knowledge   | 465                    | Antivirals and antiretrovirals                  | 168      | 14.5%    |
| Some knowledge   | 465                    | Antimalarials                                   | 15       | 1.3%     |
| Some knowledge   | 465                    | Antibiotics                                     | 3        | 0.3%     |
| Some knowledge   | 465                    | Angiotensin-converting-enzyme (ACE) inhibitors  | 26       | 2.2%     |
| Some knowledge   | 465                    | Anti-inflammatories                             | 46       | 4.0%     |
| Some knowledge   | 465                    | Non-drug technologies (e.g. plasma, stem-cells) | 35       | 3.0%     |
| Some knowledge   | 465                    | Monoclonal antibodies                           | 86       | 7.4%     |
| Some knowledge   | 465                    | Kinase inhibitors                               | 6        | 0.5%     |
| Some knowledge   | 465                    | Other                                           | 17       | 1.5%     |
| Some knowledge   | 465                    | Unknown                                         | 48       | 4.1%     |
| Some knowledge   | 465                    | I prefer not to answer                          | 15       | 1.3%     |
| Total            | 1159                   |                                                 |          |          |

In the next six months, of all \*drugs\* with at least two registred clinical trials, which one of these do you consider most likely to succeed as COVID-19 treatment?

| <b>knowledge</b> | <b>Total</b> | <b>answer_vac1</b>                             | <b>answer_vac2</b>                                | <b>n</b> | <b>%</b> |
|------------------|--------------|------------------------------------------------|---------------------------------------------------|----------|----------|
| Good knowledge   | 305          | Antivirals and antiretrovirals                 | Favipiravir                                       | 13       | 1.3%     |
| Good knowledge   | 305          | Antivirals and antiretrovirals                 | I prefer not to answer                            | 21       | 2.2%     |
| Good knowledge   | 305          | Antivirals and antiretrovirals                 | Interferons                                       | 18       | 1.9%     |
| Good knowledge   | 305          | Antivirals and antiretrovirals                 | Lopinavir-ritonavir                               | 17       | 1.8%     |
| Good knowledge   | 305          | Antivirals and antiretrovirals                 | Other                                             | 26       | 2.7%     |
| Good knowledge   | 305          | Antivirals and antiretrovirals                 | Remdesivir                                        | 162      | 16.8%    |
| Good knowledge   | 305          | Antivirals and antiretrovirals                 | Umifenovir                                        | 3        | 0.3%     |
| Good knowledge   | 305          | Antivirals and antiretrovirals                 | Unknown                                           | 45       | 4.7%     |
| Some knowledge   | 166          | Antivirals and antiretrovirals                 | Favipiravir                                       | 12       | 1.2%     |
| Some knowledge   | 166          | Antivirals and antiretrovirals                 | I prefer not to answer                            | 13       | 1.3%     |
| Some knowledge   | 166          | Antivirals and antiretrovirals                 | Interferons                                       | 10       | 1.0%     |
| Some knowledge   | 166          | Antivirals and antiretrovirals                 | Lopinavir-ritonavir                               | 7        | 0.7%     |
| Some knowledge   | 166          | Antivirals and antiretrovirals                 | Other                                             | 9        | 0.9%     |
| Some knowledge   | 166          | Antivirals and antiretrovirals                 | Remdesivir                                        | 64       | 6.6%     |
| Some knowledge   | 166          | Antivirals and antiretrovirals                 | Umifenovir                                        | 0        | 0.0%     |
| Some knowledge   | 166          | Antivirals and antiretrovirals                 | Unknown                                           | 51       | 5.3%     |
| Good knowledge   | 17           | Antimalarials                                  | Hydroxychloroquine                                | 14       | 1.4%     |
| Good knowledge   | 17           | Antimalarials                                  | I prefer not to answer                            | 1        | 0.1%     |
| Good knowledge   | 17           | Antimalarials                                  | Mefloquine                                        | 1        | 0.1%     |
| Good knowledge   | 17           | Antimalarials                                  | Unknown                                           | 1        | 0.1%     |
| Some knowledge   | 15           | Antimalarials                                  | Chloroquine                                       | 1        | 0.1%     |
| Some knowledge   | 15           | Antimalarials                                  | Hydroxychloroquine                                | 12       | 1.2%     |
| Some knowledge   | 15           | Antimalarials                                  | I prefer not to answer                            | 1        | 0.1%     |
| Some knowledge   | 15           | Antimalarials                                  | Unknown                                           | 1        | 0.1%     |
| Good knowledge   | 5            | Antibiotics                                    | Azithromycin                                      | 3        | 0.3%     |
| Good knowledge   | 5            | Antibiotics                                    | Other                                             | 1        | 0.1%     |
| Good knowledge   | 5            | Antibiotics                                    | Unknown                                           | 1        | 0.1%     |
| Some knowledge   | 3            | Antibiotics                                    | Azithromycin                                      | 1        | 0.1%     |
| Some knowledge   | 3            | Antibiotics                                    | Other                                             | 0        | 0.0%     |
| Some knowledge   | 3            | Antibiotics                                    | Unknown                                           | 2        | 0.2%     |
| Good knowledge   | 23           | Angiotensin-converting-enzyme (ACE) inhibitors | Captopril                                         | 1        | 0.1%     |
| Good knowledge   | 23           | Angiotensin-converting-enzyme (ACE) inhibitors | I prefer not to answer                            | 4        | 0.4%     |
| Good knowledge   | 23           | Angiotensin-converting-enzyme (ACE) inhibitors | Other                                             | 1        | 0.1%     |
| Good knowledge   | 23           | Angiotensin-converting-enzyme (ACE) inhibitors | Recombinant human angiotensin converting enzyme 2 | 11       | 1.1%     |
| Good knowledge   | 23           | Angiotensin-converting-enzyme (ACE) inhibitors | Telmisartan                                       | 0        | 0.0%     |

|                |     |                                                |                                                   |    |      |
|----------------|-----|------------------------------------------------|---------------------------------------------------|----|------|
| Good knowledge | 23  | Angiotensin-converting-enzyme (ACE) inhibitors | Unknown                                           | 6  | 0.6% |
| Some knowledge | 26  | Angiotensin-converting-enzyme (ACE) inhibitors | I prefer not to answer                            | 2  | 0.2% |
| Some knowledge | 26  | Angiotensin-converting-enzyme (ACE) inhibitors | Losartan                                          | 1  | 0.1% |
| Some knowledge | 26  | Angiotensin-converting-enzyme (ACE) inhibitors | Other                                             | 2  | 0.2% |
| Some knowledge | 26  | Angiotensin-converting-enzyme (ACE) inhibitors | Recombinant human angiotensin converting enzyme 2 | 9  | 0.9% |
| Some knowledge | 26  | Angiotensin-converting-enzyme (ACE) inhibitors | Telmisartan                                       | 3  | 0.3% |
| Some knowledge | 26  | Angiotensin-converting-enzyme (ACE) inhibitors | Unknown                                           | 9  | 0.9% |
| Good knowledge | 39  | Anti-inflammatories                            | Ciclesonide                                       | 0  | 0.0% |
| Good knowledge | 39  | Anti-inflammatories                            | Dexamethasone                                     | 3  | 0.3% |
| Good knowledge | 39  | Anti-inflammatories                            | I prefer not to answer                            | 7  | 0.7% |
| Good knowledge | 39  | Anti-inflammatories                            | Methylprednisolone                                | 4  | 0.4% |
| Good knowledge | 39  | Anti-inflammatories                            | Other                                             | 14 | 1.4% |
| Good knowledge | 39  | Anti-inflammatories                            | Prednisone                                        | 2  | 0.2% |
| Good knowledge | 39  | Anti-inflammatories                            | Unknown                                           | 9  | 0.9% |
| Some knowledge | 45  | Anti-inflammatories                            | Ciclesonide                                       | 2  | 0.2% |
| Some knowledge | 45  | Anti-inflammatories                            | Dexamethasone                                     | 4  | 0.4% |
| Some knowledge | 45  | Anti-inflammatories                            | I prefer not to answer                            | 6  | 0.6% |
| Some knowledge | 45  | Anti-inflammatories                            | Methylprednisolone                                | 4  | 0.4% |
| Some knowledge | 45  | Anti-inflammatories                            | Other                                             | 6  | 0.6% |
| Some knowledge | 45  | Anti-inflammatories                            | Prednisone                                        | 1  | 0.1% |
| Some knowledge | 45  | Anti-inflammatories                            | Unknown                                           | 22 | 2.3% |
| Good knowledge | 112 | Monoclonal antibodies                          | Bevacizumab                                       | 0  | 0.0% |
| Good knowledge | 112 | Monoclonal antibodies                          | I prefer not to answer                            | 24 | 2.5% |
| Good knowledge | 112 | Monoclonal antibodies                          | Leronlimab                                        | 2  | 0.2% |
| Good knowledge | 112 | Monoclonal antibodies                          | Nivolumab                                         | 2  | 0.2% |
| Good knowledge | 112 | Monoclonal antibodies                          | Other                                             | 20 | 2.1% |
| Good knowledge | 112 | Monoclonal antibodies                          | Sarilumab                                         | 0  | 0.0% |
| Good knowledge | 112 | Monoclonal antibodies                          | Tocilizumab                                       | 22 | 2.3% |
| Good knowledge | 112 | Monoclonal antibodies                          | Unknown                                           | 42 | 4.3% |
| Some knowledge | 84  | Monoclonal antibodies                          | Bevacizumab                                       | 2  | 0.2% |
| Some knowledge | 84  | Monoclonal antibodies                          | I prefer not to answer                            | 15 | 1.6% |
| Some knowledge | 84  | Monoclonal antibodies                          | Leronlimab                                        | 2  | 0.2% |
| Some knowledge | 84  | Monoclonal antibodies                          | Nivolumab                                         | 1  | 0.1% |
| Some knowledge | 84  | Monoclonal antibodies                          | Other                                             | 11 | 1.1% |
| Some knowledge | 84  | Monoclonal antibodies                          | Sarilumab                                         | 3  | 0.3% |
| Some knowledge | 84  | Monoclonal antibodies                          | Tocilizumab                                       | 13 | 1.3% |

|                |     |                                                 |                                    |    |      |
|----------------|-----|-------------------------------------------------|------------------------------------|----|------|
| Some knowledge | 84  | Monoclonal antibodies                           | Unknown                            | 37 | 3.8% |
| Good knowledge | 2   | Kinase inhibitors                               | Acalabrutinib                      | 0  | 0.0% |
| Good knowledge | 2   | Kinase inhibitors                               | Imatinib                           | 0  | 0.0% |
| Good knowledge | 2   | Kinase inhibitors                               | Other                              | 0  | 0.0% |
| Good knowledge | 2   | Kinase inhibitors                               | Unknown                            | 2  | 0.2% |
| Some knowledge | 6   | Kinase inhibitors                               | Acalabrutinib                      | 1  | 0.1% |
| Some knowledge | 6   | Kinase inhibitors                               | Imatinib                           | 2  | 0.2% |
| Some knowledge | 6   | Kinase inhibitors                               | Other                              | 1  | 0.1% |
| Some knowledge | 6   | Kinase inhibitors                               | Unknown                            | 2  | 0.2% |
| Good knowledge | 83  | Non-drug technologies (e.g. plasma, stem-cells) | Immunoglobulin from cured patients | 47 | 4.9% |
| Good knowledge | 83  | Non-drug technologies (e.g. plasma, stem-cells) | Natural-killer cells               | 2  | 0.2% |
| Good knowledge | 83  | Non-drug technologies (e.g. plasma, stem-cells) | Other                              | 0  | 0.0% |
| Good knowledge | 83  | Non-drug technologies (e.g. plasma, stem-cells) | Plasma                             | 27 | 2.8% |
| Good knowledge | 83  | Non-drug technologies (e.g. plasma, stem-cells) | Stem-cells                         | 5  | 0.5% |
| Good knowledge | 83  | Non-drug technologies (e.g. plasma, stem-cells) | Unknown                            | 2  | 0.2% |
| Some knowledge | 35  | Non-drug technologies (e.g. plasma, stem-cells) | Immunoglobulin from cured patients | 17 | 1.8% |
| Some knowledge | 35  | Non-drug technologies (e.g. plasma, stem-cells) | Natural-killer cells               | 1  | 0.1% |
| Some knowledge | 35  | Non-drug technologies (e.g. plasma, stem-cells) | Other                              | 1  | 0.1% |
| Some knowledge | 35  | Non-drug technologies (e.g. plasma, stem-cells) | Plasma                             | 11 | 1.1% |
| Some knowledge | 35  | Non-drug technologies (e.g. plasma, stem-cells) | Stem-cells                         | 1  | 0.1% |
| Some knowledge | 35  | Non-drug technologies (e.g. plasma, stem-cells) | Unknown                            | 4  | 0.4% |
| Total          | 966 |                                                 |                                    |    |      |

What is the highest degree of education you have completed?

| <b>knowledge</b> | <b>total_knowledge</b> | <b>answer_vac1</b> | <b>n</b> | <b>%</b> |
|------------------|------------------------|--------------------|----------|----------|
| Good knowledge   | 626                    | Associate's degree | 11       | 1.0%     |
| Good knowledge   | 626                    | Bachelor's degree  | 9        | 0.9%     |
| Good knowledge   | 626                    | Doctoral degree    | 555      | 52.9%    |
| Good knowledge   | 626                    | Master's degree    | 51       | 4.9%     |
| Some knowledge   | 424                    | Associate's degree | 5        | 0.5%     |
| Some knowledge   | 424                    | Bachelor's degree  | 14       | 1.3%     |
| Some knowledge   | 424                    | Doctoral degree    | 358      | 34.1%    |
| Some knowledge   | 424                    | Master's degree    | 47       | 4.5%     |
| Total            | 1050                   |                    |          |          |



Which occupation type best applies to you?

| <b>knowledge</b> | <b>total_knowledge</b> | <b>answer_vac1</b>                     | <b>n</b> | <b>%</b> |
|------------------|------------------------|----------------------------------------|----------|----------|
| Good knowledge   | 633                    | Manager, Executive                     | 13       | 1.2%     |
| Good knowledge   | 633                    | Masters, PhD Student                   | 26       | 2.5%     |
| Good knowledge   | 633                    | Other                                  | 27       | 2.5%     |
| Good knowledge   | 633                    | Physician, Clinician                   | 68       | 6.4%     |
| Good knowledge   | 633                    | Policy maker                           | 3        | 0.3%     |
| Good knowledge   | 633                    | Professor, Researcher                  | 450      | 42.5%    |
| Good knowledge   | 633                    | Public Health, Healthcare Professional | 46       | 4.3%     |
| Some knowledge   | 426                    | Manager, Executive                     | 6        | 0.6%     |
| Some knowledge   | 426                    | Masters, PhD Student                   | 29       | 2.7%     |
| Some knowledge   | 426                    | Other                                  | 24       | 2.3%     |
| Some knowledge   | 426                    | Physician, Clinician                   | 20       | 1.9%     |
| Some knowledge   | 426                    | Policy maker                           | 1        | 0.1%     |
| Some knowledge   | 426                    | Professor, Researcher                  | 314      | 29.7%    |
| Some knowledge   | 426                    | Public Health, Healthcare Professional | 32       | 3.0%     |

1059

What type of institution do you work in?

| <b>knowledge</b> | <b>total_knowledge</b> | <b>answer_vac1</b>                | <b>n</b> | <b>%</b> |
|------------------|------------------------|-----------------------------------|----------|----------|
| Good knowledge   | 628                    | Government                        | 67       | 6.4%     |
| Good knowledge   | 628                    | Hospital or similar organizations | 69       | 6.5%     |
| Good knowledge   | 628                    | Industry                          | 26       | 2.5%     |
| Good knowledge   | 628                    | University, Research Organization | 466      | 44.2%    |
| Some knowledge   | 426                    | Government                        | 59       | 5.6%     |
| Some knowledge   | 426                    | Hospital or similar organizations | 35       | 3.3%     |
| Some knowledge   | 426                    | Industry                          | 18       | 1.7%     |
| Some knowledge   | 426                    | University, Research Organization | 314      | 29.8%    |
| Total            | 1054                   |                                   |          |          |

How many years of experience you have in your field?

| <b>knowledge</b> | <b>total_knowledge</b> | <b>answer_vac1</b>      | <b>n</b> | <b>%</b> |
|------------------|------------------------|-------------------------|----------|----------|
| Good knowledge   | 634                    | Between 10 and 20 years | 195      | 18.4%    |
| Good knowledge   | 634                    | Between 5 and 10 years  | 83       | 7.8%     |
| Good knowledge   | 634                    | Less than 5 years       | 33       | 3.1%     |
| Good knowledge   | 634                    | More than 20 years      | 323      | 30.4%    |
| Some knowledge   | 427                    | Between 10 and 20 years | 139      | 13.1%    |
| Some knowledge   | 427                    | Between 5 and 10 years  | 78       | 7.4%     |
| Some knowledge   | 427                    | Less than 5 years       | 40       | 3.8%     |
| Some knowledge   | 427                    | More than 20 years      | 170      | 16.0%    |
| Total            | 1061                   |                         |          |          |

In which region do you live?

| <b>knowledge</b> | <b>total knowledge</b> | <b>answer_vac1</b>                                          | <b>n</b> | <b>%</b> |
|------------------|------------------------|-------------------------------------------------------------|----------|----------|
| Good knowledge   | 633                    | Africa                                                      | 43       | 4.1%     |
| Good knowledge   | 633                    | Asia (including Middle East)                                | 127      | 12.0%    |
| Good knowledge   | 633                    | Australasia or Pacific Islands                              | 17       | 1.6%     |
| Good knowledge   | 633                    | Europe                                                      | 163      | 15.4%    |
| Good knowledge   | 633                    | North America (including Central America and the Caribbean) | 170      | 16.0%    |
| Good knowledge   | 633                    | South America                                               | 113      | 10.7%    |
| Some knowledge   | 427                    | Africa                                                      | 33       | 3.1%     |
| Some knowledge   | 427                    | Asia (including Middle East)                                | 97       | 9.2%     |
| Some knowledge   | 427                    | Australasia or Pacific Islands                              | 17       | 1.6%     |
| Some knowledge   | 427                    | Europe                                                      | 128      | 12.1%    |
| Some knowledge   | 427                    | North America (including Central America and the Caribbean) | 82       | 7.7%     |
| Some knowledge   | 427                    | South America                                               | 70       | 6.6%     |
| Total            | 1060                   |                                                             |          |          |
